# Supplementary material
Source: HighWire-hosted journal article supplement (https://gut.bmj.com/content/70/3/544)
Supplement: inline-supplementary-material-7 [file inline-supplementary-material-7.pdf]

**Table S05**

| Prediction | <b>FOCUS</b><br><i>n tiles</i> = 203,876<br><i>n slides</i> = 510 | <b>TCGA</b><br><i>n tiles</i> = 104,614<br><i>n slides</i> = 431 | <b>GRAMPIAN</b><br><i>n tiles</i> = 189,418<br><i>n slides</i> = 265 |
|------------|-------------------------------------------------------------------|------------------------------------------------------------------|----------------------------------------------------------------------|
| imCMS1     | 19%                                                               | 19%                                                              | 5%                                                                   |
| imCMS2     | 36%                                                               | 40%                                                              | 46%                                                                  |
| imCMS3     | 13%                                                               | 20%                                                              | 30%                                                                  |
| imCMS4     | 32%                                                               | 21%                                                              | 19%                                                                  |

No unclassified slides used
