# Supplementary material
Source: HighWire-hosted journal article supplement (https://gut.bmj.com/content/70/3/544)

a

TCGA

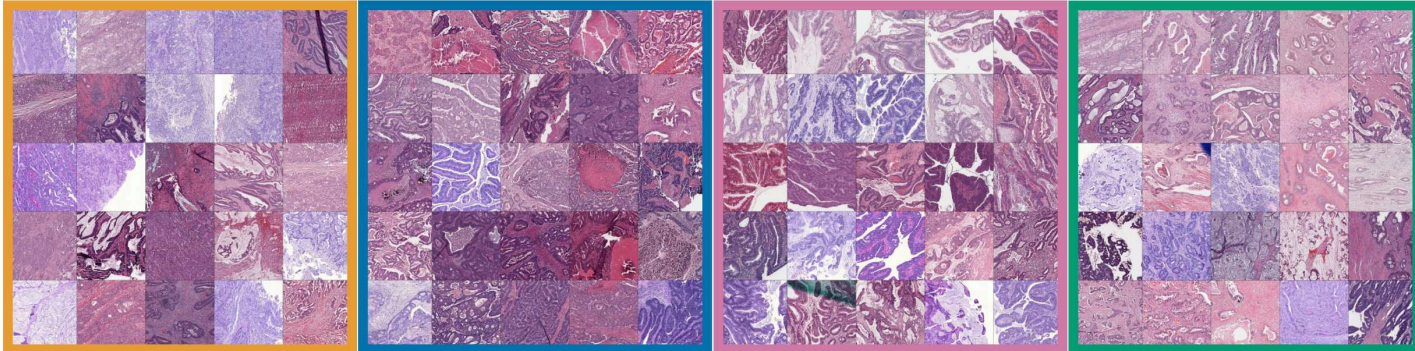

GRAMPIAN

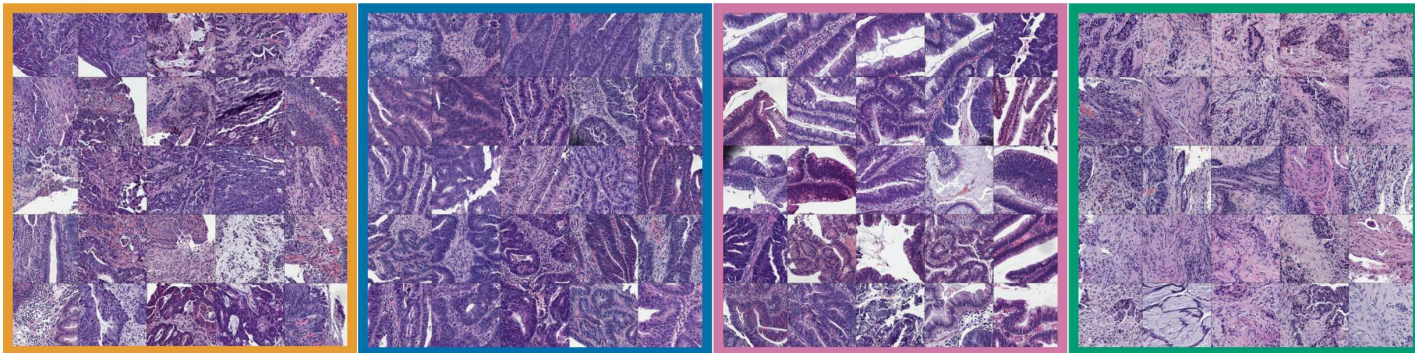

b

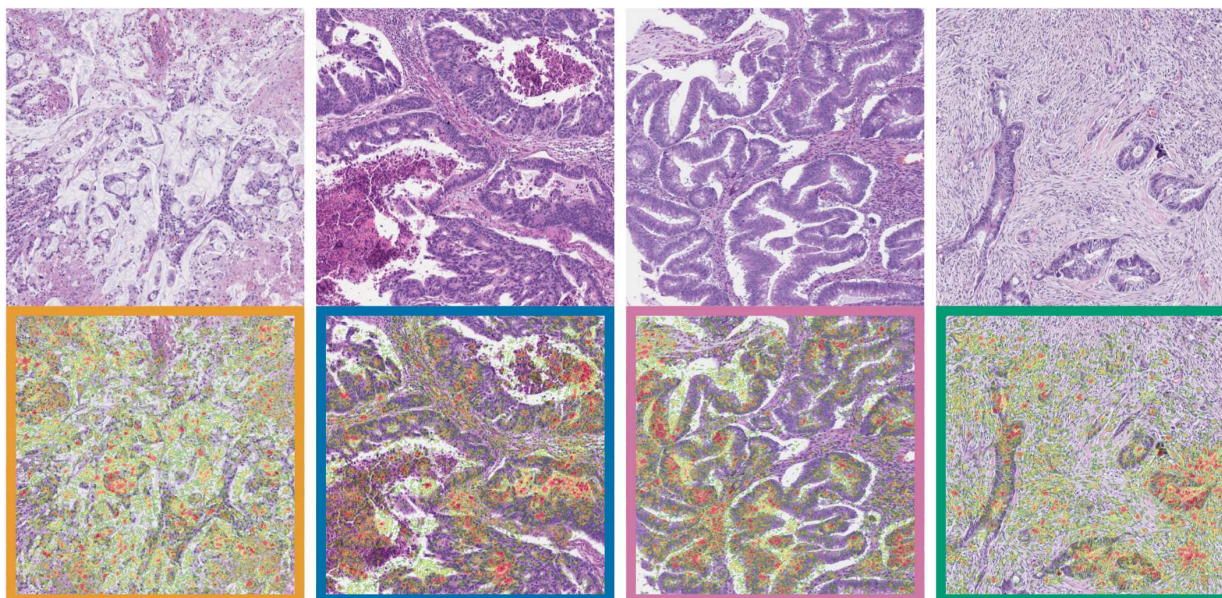

Supplement: inline-supplementary-material-14 [file inline-supplementary-material-14.pdf]
